# Supplementary material for: Overexpression of a Banana Aquaporin Gene MaPIP1;1 Enhances Tolerance to Multiple Abiotic Stresses in Transgenic Banana and Analysis of Its Interacting Transcription Factors
Source: Front Plant Sci. 2021 Aug 25;12:699230. doi: 10.3389/fpls.2021.699230 (PMC8424054; doi:10.3389/fpls.2021.699230)
Supplement: Supplementary file 9 [file Table_9.XLSX]

## Sheet: Sheet1
Table S9. Data of physiological indices between WT and transgenic plants under normal, drought, and recovery conditions
Physiological indicators	Line	Control	Drought	Recovery
Chlorophyll	WT	43.1021a	29.1667b	18.4936c
	L1	39.3667a	31.3333b	27.2154b
	L2	38.1125a	37.1032a	29.6036a
Ion leakage	WT	5.8733a	16.5533b	22.6167b
	L1	5.1336b	9.9498a	6.9567b
	L2	4.7401b	8.8767a	6.0878ab
MDA content	WT	12.9631c	45.9908b	75.3947a
	L1	10.0587c	22.6864b	36.4849a
	L2	8.1293c	25.3596b	32.7136a
PRO content	WT	17.2333c	28.5233b	39.6321a
	L1	19.5067b	45.4402a	51.9933a
	L2	21.3133c	49.2167b	55.9567a
Soluble sugar content	WT	6.3273c	12.5667b	27.7557a
	L1	9.3174c	23.7113b	43.1057a
	L2	11.5843c	27.4103b	45.6297a
ABA content	WT	2.8033b	3.3504ab	5.7467a
	L1	2.6903b	4.2033ab	6.8433a
	L2	2.4367b	5.4333ab	7.0614a
Data are means ± SD of n = 3 biological replicates. Means denoted by the same letter are not signiﬁcantly different at P < 0.05 as determined by Duncan’s multiple range test.
